# Supplementary material
Source: Research Square preprint supplement (doi:10.21203/rs.3.rs-14733/v3)
Supplement: Supplementary file 1 [file 3e8a70c610304877163c96fb.xlsx]

## Sheet: Table A
	Table A Distribution of respondents according to parental drinking and parental absence by past month alcohol use
		Past month alcohol use
		No			Yes			Total
		N	%		N	%		N
	Father (n=46,085)
	FN	8870	96.1		362	3.9		9232
	FD	28493	93.6		1953	6.4		30446
	NF	5913	92.3		494	7.7		6407
	Mother (n=46,145)
	MN	18020	96.1		733	3.9		18753
	MD	24426	92.5		1978	7.5		26404
	NM	890	90.1		98	9.9		988
	FN=Father does not drink, FD=Father drinks, NF=No father at home,
	MN=Mother does not drink, MD=Mother drinks, NM=No mother at home

## Sheet: Table B
	Table B Distribution of respondents for parental drinking according to paretnal composition by past month alcohol use
		Past month alcohol use
		No			Yes			Total
		N=43,230			N=2,805			N=46,035
		N	％		N	％		N
	FN/MN	5979	97.3461		163	2.65386		6142
	FN/MD	2716	93.3013		195	6.69873		2911
	FN/NM	175	97.7654		4	2.23464		179
	FD/MN	9608	95.4405		459	4.55945		10067
	FD/MD	18307	92.75		1431	7.24997		19738
	FD/NM	543	89.7521		62	10.2479		605
	NF/MN	2386	95.6696		108	4.33039		2494
	NF/MD	3348	90.5109		351	9.48905		3699
	NF/NM	168	84		32	16		200
	FN=Father does not drink, FD=Father drinks, NF=No father at home,
	MN=Mother does not drink, MD=Mother drinks, NM=No mother at home

## Sheet: Table C
	Table C Logistic regression examining the associations between parental drinking according to parental composition and past month alcohol use
		Model 1: Unadjusted			Model 2a: Adjusted for covariates			Model 3a: Interactions between parental drinking and parental absence
		odds ratio (95% Cl)	p		odds ratio (95% Cl)	p		odds ratio (95% Cl)	p
	FD	1.28(1.20-1.37)	<.001＊		1.31(1.21-1.42)	<.001＊		1.67(1.42-1.95)	<.001＊
	NF	1.22(1.15-1.30)	<.001＊		1.01(0.96-1.06)	0.666		1.19(1.12-1.27)	<.001＊
	MD	1.89(1.69-2.12)	<.001＊		1.71(1.48-1.97)	<.001＊		2.16(1.72-2.70)	<.001＊
	NM	1.45(1.16-1.80)	.001＊		1.17(1.00-1.38)	.047＊		1.44(1.19-1.73)	<.001＊
	FD×MD							0.71(0.58-0.87)	.001＊
	NF×NM							1.90(1.25-2.89)	.002＊
	FD=Father drinks, NF=No father at home, MD=Mother drinks, NM=No mother at home, CI=Confidence interval P＜.05＊
	aModel 2 and Model 3 controls for gender, grade, getting up at the same time every day, going to the bed at the same time everyday, eating breakfast, enjoying school, eating dinner with one’s family, hours spent in the absence of adults, having close friends to hang out with, having friends with whom one can consult, drinking experience with peers, talking with one’s parent about one’s problem, t…
